# Supplementary material
Source: PubMed Central journal article supplement (PMC5500201)
Supplement: NIHMS870264-supplement-supplemental_tables.pdf [file NIHMS870264-supplement-supplemental_tables.pdf]

## Supplement Material

**Table I.** Mean levels of autoantibody titers and apoB-immune complexes in patients according to sex.

| Variable            | Male (n=1546)      | Female (N=1963)     | P-Value |
|---------------------|--------------------|---------------------|---------|
| <b>Entire group</b> |                    |                     |         |
| IgG MDA-LDL         | 5055 (3401-7771)   | 5484 (3593-8150)    | 0.97    |
| IgM MDA-LDL         | 13525 (9546-18954) | 16678 (12344-22724) | <0.001  |
| IgG ApoB-IC         | 4240 (3302-5353)   | 4113 (3280-5232)    | 0.018   |
| IgM ApoB-IC         | 3065 (2044-4494)   | 3653 (2411-5330)    | <0.001  |
| <b>Black</b>        |                    |                     |         |
| IgG MDA-LDL         | 5964 (4142-9039)   | 6036 (4252-8716)    | 0.17    |
| IgM MDA-LDL         | 13552 (9312-18887) | 16615 (12062-22357) | <0.001  |
| IgG ApoB-IC         | 4457 (3385-5510)   | 4143 (3209-5264)    | <0.001  |
| IgM ApoB-IC         | 3045 (2035-4775)   | 3454 (2302-5136)    | 0.13    |
| <b>White</b>        |                    |                     |         |
| IgG MDA-LDL         | 3941 (2875-5691)   | 4601 (3042-7960)    | 0.11    |
| IgM MDA-LDL         | 13657 (9694-19106) | 16888 (12481-23744) | <0.001  |
| IgG ApoB-IC         | 4011 (3141-4958)   | 4075 (3197-5139)    | 0.94    |
| IgM ApoB-IC         | 2942 (1916-4073)   | 3584 (2358-4909)    | <0.001  |
| <b>Hispanic</b>     |                    |                     |         |
| IgG MDA-LDL         | 4496 (3102-6877)   | 4966 (3087-7388)    | 0.99    |
| IgM MDA-LDL         | 13433 (9881-18645) | 16632 (12844-22747) | 0.46    |
| IgG ApoB-IC         | 4119 (3295-5283)   | 4001 (3222-5252)    | <0.001  |
| IgM ApoB-IC         | 3521 (2270-4627)   | 4636 (3040-6203)    | 0.72    |

Values are median (IQR) in relative light units.

**Table II.** Mean levels of autoantibody titers and apoB-immune complexes in patients according to demographic variables.

|                     | IgG MDA-LDL      | IgM MDA-LDL         | IgG ApoB-IC      | IgM ApoB-IC      |
|---------------------|------------------|---------------------|------------------|------------------|
| HTN, no             | 5315 (3617-8158) | 15465 (11219-21705) | 4130 (3256-5331) | 3392 (2218-4934) |
| HTN, yes            | 5318 (3479-7845) | 15333 (10781-21038) | 4214 (3242-5310) | 3388(2233-4945)  |
| P-value             | 0.21             | 0.10                | 0.87             | 0.64             |
| Diabetes, no        | 5303 (3558-8140) | 13906 (9923-18822)  | 4408 (3288-5579) | 2875 (1880-4339) |
| Diabetes, yes       | 5280 (3522-7952) | 15559 (11090-21601) | 4145 (3238-5238) | 3454 (2287-5048) |
| P-value             | 0.69             | 0.001               | 0.027            | <0.001           |
| Not current smoking | 5093 (3449-7571) | 15544 (11124-21182) | 4340 (3407-5497) | 3399 (2249-5047) |
| Current smoking     | 5823 (3743-8984) | 14810 (10583-21292) | 3731 (2941-4739) | 3372 (2165-4726) |
| P-value             | <0.001           | 0.34                | <0.001           | 0.90             |

Values are median (IQR) in relative light units.

**Table III.** Spearman correlations between continuous variables.

|             |              | IgM<br>MDA-LDL | IgG<br>ApoB-IC | IgM<br>ApoB-IC | Age    | BMI    | TC     | LDL-C  | HDL-C  | TG     | VLDL-C |
|-------------|--------------|----------------|----------------|----------------|--------|--------|--------|--------|--------|--------|--------|
| IgG MDA-LDL | Spearman rho | 0.12           | 0.24           | 0.10           | 0.04   | 0.02   | -0.07  | -0.07  | 0.06   | -0.07  | -0.07  |
|             | p-value      | <0.001         | <0.001         | <0.001         | 0.024  | 0.22   | <0.001 | <0.001 | 0.001  | <0.001 | <0.001 |
| IgM MDA-LDL | Spearman rho |                | -0.04          | 0.61           | -0.13  | -0.01  | -0.04  | -0.04  | 0.03   | -0.03  | -0.03  |
|             | p-value      |                | 0.04           | <0.001         | <0.001 | 0.411  | 0.024  | 0.011  | 0.135  | 0.076  | 0.063  |
| IgG ApoB-IC | Spearman rho |                |                | -0.03          | 0.07   | 0.09   | -0.06  | -0.06  | 0.00   | 0.00   | 0.00   |
|             | p-value      |                |                | 0.086          | <0.001 | <0.001 | 0.001  | <0.001 | 0.812  | 0.814  | 0.943  |
| IgM ApoB-IC | Spearman rho |                |                |                | -0.26  | -0.12  | -0.11  | -0.12  | 0.04   | -0.05  | -0.05  |
|             | p-value      |                |                |                | <0.001 | <0.001 | <0.001 | <0.001 | 0.013  | 0.002  | 0.002  |
| Age         | Spearman rho |                |                |                |        | 0.07   | 0.18   | 0.11   | 0.08   | 0.14   | 0.14   |
|             | p-value      |                |                |                |        | <0.001 | <0.001 | <0.001 | <0.001 | <0.001 | <0.001 |
| BMI         | Spearman rho |                |                |                |        |        | 0.06   | 0.10   | -0.21  | 0.21   | 0.21   |
|             | p-value      |                |                |                |        |        | <0.001 | <0.001 | <0.001 | <0.001 | <0.001 |
| TC          | Spearman rho |                |                |                |        |        |        | 0.87   | 0.07   | 0.35   | 0.35   |
|             | p-value      |                |                |                |        |        |        | <0.001 | <0.001 | <0.001 | <0.001 |
| LDL-C       | Spearman rho |                |                |                |        |        |        |        | -0.14  | 0.17   | 0.17   |
|             | p-value      |                |                |                |        |        |        |        | <0.001 | <0.001 | <0.001 |
| HDL-C       | Spearman rho |                |                |                |        |        |        |        |        | -0.44  | -0.44  |
|             | p-value      |                |                |                |        |        |        |        |        | <0.001 | <0.001 |
| TG          | Spearman rho |                |                |                |        |        |        |        |        |        | 1.00   |
|             | p-value      |                |                |                |        |        |        |        |        |        | <0.001 |

**Table IV.** Binary Logistic regression analysis for the presence or absence of coronary artery calcium by ethnicity.

| Black                | Odds ratio | 95% CI |       | P-Value |
|----------------------|------------|--------|-------|---------|
|                      |            | Lower  | Upper |         |
| Age per decile       | 4.16       | 3.37   | 5.13  | <0.001  |
| Male sex             | 2.75       | 1.96   | 3.87  | <0.001  |
| Hypertension         | 1.10       | 0.81   | 1.49  | 0.56    |
| Diabetes             | 1.74       | 1.15   | 2.63  | 0.009   |
| Current smoking      | 3.18       | 2.28   | 4.44  | <0.001  |
| BMI                  | 1.02       | 1.00   | 1.05  | 0.091   |
| LDL-C per SD         | 1.05       | 0.91   | 1.05  | 0.52    |
| HDL-C per SD         | 1.04       | 0.92   | 1.15  | 0.62    |
| Triglycerides per SD | 1.12       | 0.94   | 1.33  | 0.20    |
| IgG MDA-LDL per SD   | 1.25       | 1.05   | 1.48  | 0.011   |
| IgM MDA-LDL per SD   | 0.98       | 0.82   | 1.18  | 0.84    |
| IgG ApoB-IC per SD   | 0.93       | 0.80   | 1.08  | 0.34    |
| IgM ApoB-IC per SD   | 1.09       | 0.90   | 1.338 | 0.36    |

| White           | Odds ratio | 95% CI |       | P-Value |
|-----------------|------------|--------|-------|---------|
|                 |            | Lower  | Upper |         |
| Age per decile  | 5.00       | 3.71   | 6.74  | <0.001  |
| Male sex        | 3.51       | 2.16   | 5.68  | <0.001  |
| Hypertension    | 1.47       | 0.96   | 2.24  | 0.073   |
| Diabetes        | 2.93       | 1.41   | 6.09  | 0.004   |
| Current smoking | 1.73       | 1.09   | 2.76  | 0.020   |
| BMI             | 1.03       | 0.99   | 1.07  | 0.21    |

|                      |      |      |      |       |
|----------------------|------|------|------|-------|
| LDL-C per SD         | 1.24 | 1.01 | 1.52 | 0.038 |
| HDL-C per SD         | 0.83 | 0.64 | 1.07 | 0.15  |
| Triglycerides per SD | 0.89 | 0.71 | 1.12 | 0.33  |
| IgG MDA-LDL per SD   | 1.15 | 0.93 | 1.42 | 0.20  |
| IgM MDA-LDL per SD   | 0.95 | 0.75 | 1.20 | 0.67  |
| IgG ApoB-IC per SD   | 0.62 | 0.67 | 1.02 | 0.07  |
| IgM ApoB-IC per SD   | 1.04 | 0.81 | 1.35 | 0.75  |

| Hispanic             | Odds ratio | 95% CI |       | P-Value |
|----------------------|------------|--------|-------|---------|
|                      |            | Lower  | Upper |         |
| Age per decile       | 4.52       | 2.87   | 7.10  | <0.001  |
| Male sex             | 5.92       | 2.60   | 13.47 | <0.001  |
| Hypertension         | 1.36       | 0.67   | 2.75  | 0.40    |
| Diabetes             | 2.56       | 1.17   | 5.58  | 0.018   |
| Current smoking      | 1.68       | 0.75   | 3.81  | 0.21    |
| BMI                  | 1.10       | 1.04   | 1.17  | 0.002   |
| LDL-C per SD         | 1.10       | 0.78   | 1.54  | 0.58    |
| HDL-C per SD         | 1.37       | 0.87   | 2.17  | 0.18    |
| Triglycerides per SD | 1.40       | 1.01   | 1.97  | 0.044   |
| IgG MDA-LDL per SD   | 1.06       | 0.76   | 1.46  | 0.73    |
| IgM MDA-LDL per SD   | 1.21       | 0.75   | 1.95  | 0.45    |
| IgG ApoB-IC per SD   | 0.86       | 0.61   | 1.20  | 0.37    |
| IgM ApoB-IC per SD   | 0.96       | 0.61   | 1.53  | 0.88    |

**Table V.** Binary Logistic regression analysis for the presence or absence of abdominal aortic plaque by ethnicity.

|                      | Odds ratio | 95% CI |       | P-Value |
|----------------------|------------|--------|-------|---------|
|                      |            | Lower  | Upper |         |
| <b>Black</b>         |            |        |       |         |
| Age per decile       | 2.27       | 1.96   | 2.64  | <0.001  |
| Male sex             | 1.16       | 0.87   | 1.53  | 0.31    |
| Hypertension         | 0.95       | 0.73   | 1.23  | 0.68    |
| Diabetes             | 1.25       | 0.85   | 1.85  | 0.26    |
| Current smoking      | 1.79       | 1.34   | 2.38  | <0.001  |
| BMI                  | 0.98       | 0.96   | 1.00  | 0.038   |
| LDL-C per SD         | 1.01       | 0.89   | 1.15  | 0.85    |
| HDL-C per SD         | 0.92       | 0.80   | 1.06  | 0.23    |
| Triglycerides per SD | 1.24       | 1.06   | 1.45  | 0.007   |
| IgG MDA-LDL per SD   | 1.14       | 0.98   | 1.37  | 0.090   |
| IgM MDA-LDL per SD   | 1.08       | 0.91   | 1.28  | 0.39    |
| IgG ApoB-IC per SD   | 0.83       | 0.73   | 0.95  | 0.008   |
| IgM ApoB-IC per SD   | 0.98       | 0.82   | 1.16  | 0.79    |

|                 | Odds ratio | 95% CI |       | P-Value |
|-----------------|------------|--------|-------|---------|
|                 |            | Lower  | Upper |         |
| <b>White</b>    |            |        |       |         |
| Age per decile  | 2.40       | 1.96   | 2.93  | <0.001  |
| Male sex        | 0.98       | 0.67   | 1.43  | 0.93    |
| Hypertension    | 1.28       | 0.89   | 1.83  | 0.18    |
| Diabetes        | 2.45       | 1.21   | 4.96  | 0.013   |
| Current smoking | 3.08       | 2.08   | 4.55  | <0.001  |

|                      |      |      |      |        |
|----------------------|------|------|------|--------|
| BMI                  | 0.94 | 0.91 | 0.97 | <0.001 |
| LDL-C per SD         | 1.21 | 1.01 | 1.45 | 0.037  |
| HDL-C per SD         | 0.77 | 0.63 | 0.93 | 0.007  |
| Triglycerides per SD | 1.16 | 0.96 | 1.40 | 0.13   |
| IgG MDA-LDL per SD   | 1.02 | 0.86 | 1.21 | 0.80   |
| IgM MDA-LDL per SD   | 1.07 | 0.87 | 1.32 | 0.52   |
| IgG ApoB-IC per SD   | 0.99 | 0.83 | 1.19 | 0.96   |
| IgM ApoB-IC per SD   | 0.89 | 0.71 | 1.11 | 0.28   |

|                      | Odds ratio | 95% CI |       | P-Value |
|----------------------|------------|--------|-------|---------|
|                      |            | Lower  | Upper |         |
| Hispanic             |            |        |       |         |
| Age per decile       | 2.60       | 1.96   | 3.45  | <0.001  |
| Male sex             | 0.98       | 0.59   | 1.63  | 0.93    |
| Hypertension         | 0.48       | 0.29   | 0.81  | 0.006   |
| Diabetes             | 1.19       | 0.57   | 2.48  | 0.64    |
| Current smoking      | 1.96       | 1.07   | 3.58  | 0.029   |
| BMI                  | 0.98       | 0.94   | 1.02  | 0.39    |
| LDL-C per SD         | 1.17       | 0.91   | 1.50  | 0.23    |
| HDL-C per SD         | 0.79       | 0.56   | 1.10  | 0.16    |
| Triglycerides per SD | 1.13       | 0.88   | 1.41  | 0.38    |
| IgG MDA-LDL per SD   | 1.03       | 0.81   | 1.31  | 0.80    |
| IgM MDA-LDL per SD   | 1.50       | 1.06   | 2.12  | 0.023   |
| IgG ApoB-IC per SD   | 0.96       | 0.76   | 1.21  | 0.75    |
| IgM ApoB-IC per SD   | 0.66       | 0.47   | 0.92  | 0.014   |
