# Supplementary material
Source: PubMed Central journal article supplement (PMC5500201)

# Dallas Heart Study - Relationship of IgG MDA-LDL levels to risk of MACE in Blacks

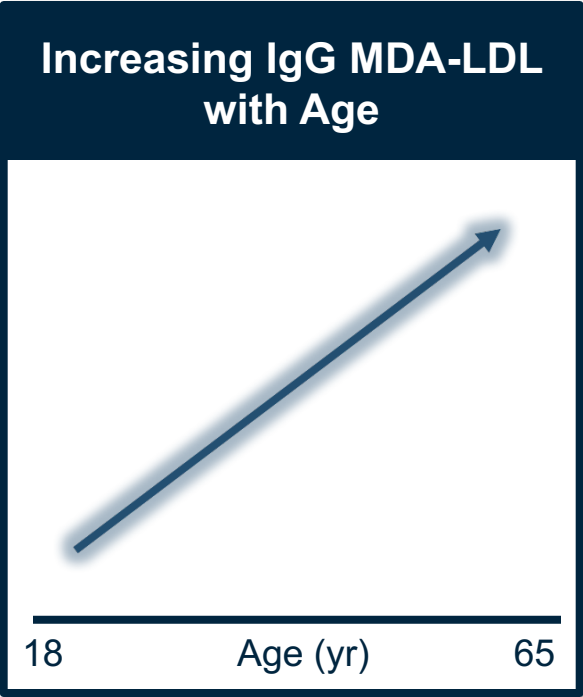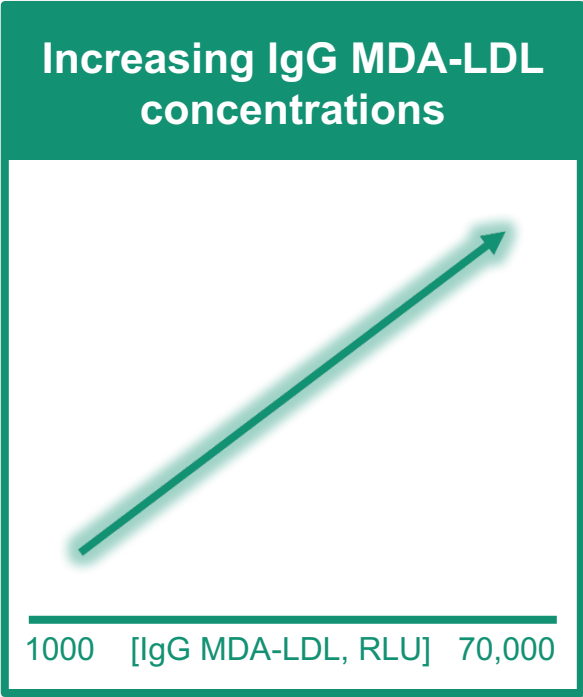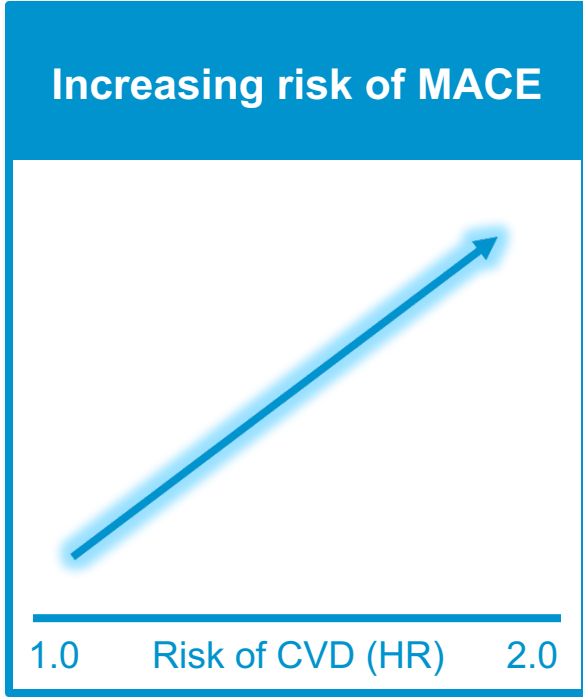

Supplement: NIHMS870264-supplement-Graphic_Abstract.pdf [file NIHMS870264-supplement-Graphic_Abstract.pdf]
